# Supplementary material for: New ambient pressure organic superconductors κH- and κL-(DMEDO-TSeF)2[Au(CN)4](THF)
Source: Royal Society of Chemistry journal article supplement (doi:10.1039/b516940b), 2006-01-01
Supplement: b516940b.pdf [file b516940b.pdf]

## Electronic Supplementary Information (ESI) service

New ambient pressure organic superconductors  $\kappa_H$ - and  $\kappa_L$ -(DMEDO-TSeF)<sub>2</sub>[Au(CN)<sub>4</sub>](THF)

Takashi Shirahata, Megumi Kibune and Tatsuro Imakubo

Imakubo Initiative Research Unit, RIKEN, 2-1 Hirosawa, Wako, Saitama 351-0198, Japan.

E-mail: tsirahat@riken.jp, imakubo@riken.jp

### Hydrogen bonds in $\kappa_H$ -(DMEDO-TSeF)<sub>2</sub>[Au(CN)<sub>4</sub>](THF)

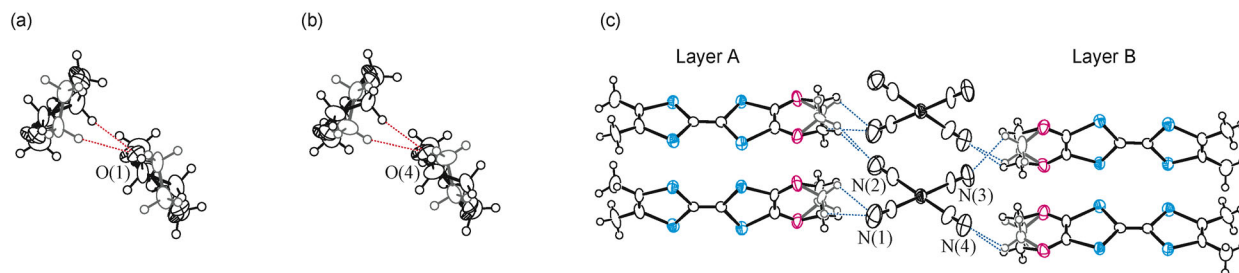

**Fig. 1** Hydrogen bonds in  $\kappa_H$ -phase. Red dotted lines indicate CH...O hydrogen bonds; (a) in the layer A and (b) the layer B. (c) Blue dotted lines indicate CH...N hydrogen bonds between the donor and the anion. Gray atoms and bonds indicate minor orientation of the disordered ethylene bridge.

**Table 1** Hydrogen bond distances<sup>a</sup> for  $\kappa_H$ -(DMEDO-TSeF)<sub>2</sub>[Au(CN)<sub>4</sub>](THF) less than 3.0 Å

| Atom                                            | Atom   | Distance / Å | ADC <sup>b</sup> | Atom             | Atom   | Distance / Å | ADC <sup>b</sup> |
|-------------------------------------------------|--------|--------------|------------------|------------------|--------|--------------|------------------|
| In layer A                                      |        |              |                  | In layer B       |        |              |                  |
| HCH...O                                         |        |              |                  |                  |        |              |                  |
| For the major orientation of the ethylene group |        |              |                  |                  |        |              |                  |
| O(1)                                            | H(7A1) | 2.497        | 4                | O(4)             | H(18B) | 2.517        | 55404            |
| For the minor orientation of the ethylene group |        |              |                  |                  |        |              |                  |
| O(1)                                            | H(8B2) | 2.675        | 4                | O(4)             | H(17D) | 2.696        | 55404            |
| H <sub>2</sub> CH...O                           |        |              |                  |                  |        |              |                  |
| O(1)                                            | H(9C)  | 2.959        | 2                | O(3)             | H(20C) | 2.883        | 65703            |
| O(2)                                            | H(9A)  | 2.989        | 3                |                  |        |              |                  |
| Molecule A-Anion                                |        |              |                  | Molecule B-Anion |        |              |                  |
| HCH...N                                         |        |              |                  |                  |        |              |                  |
| For the major orientation of the ethylene group |        |              |                  |                  |        |              |                  |
| N(1)                                            | H(7A2) | 2.810        | 4                | N(3)             | H(17A) | 2.773        | 4                |
| N(1)                                            | H(8A1) | 2.990        | 4                | N(3)             | H(17A) | 2.789        | 1                |
| N(2)                                            | H(8A2) | 2.548        | 1                | N(3)             | H(18A) | 2.698        | 1                |
|                                                 |        |              |                  | N(4)             | H(18A) | 2.671        | 4                |
|                                                 |        |              |                  | N(3)             | H(18B) | 2.808        | 1                |
| For the minor orientation of the ethylene group |        |              |                  |                  |        |              |                  |
| N(1)                                            | H(7B1) | 2.590        | 4                | N(3)             | H(17C) | 2.671        | 1                |
| N(1)                                            | H(7B2) | 2.592        | 4                | N(3)             | H(17C) | 2.934        | 4                |
| N(2)                                            | H(8B1) | 2.746        | 1                | N(3)             | H(17D) | 2.886        | 1                |
| N(2)                                            | H(8B1) | 2.965        | 4                | N(4)             | H(18C) | 2.535        | 4                |
|                                                 |        |              |                  | N(3)             | H(18C) | 2.905        | 1                |
|                                                 |        |              |                  | N(4)             | H(18D) | 2.844        | 4                |
| H <sub>2</sub> CH...N                           |        |              |                  |                  |        |              |                  |
| N(1)                                            | H(10A) | 2.495        | 55602            | N(4)             | H(19A) | 2.960        | 66703            |
|                                                 |        |              |                  | N(4)             | H(19C) | 2.589        | 65602            |

<sup>a</sup> The hydrogen bonds shorter than sum of the van der Waals radii are represented by the pink characters; sum of the van der Waals radii: O...H = 2.72 Å; N...H = 2.75 Å; A. Bondi, *J. Phys. Chem.*, 1964, **68**, 411–451. <sup>b</sup> Symmetry operators: (1) +X, +Y, +Z; (2) -X, 1/2+Y, 1/2-Z; (3) -X, -Y, -Z; (4) +X, 1/2-Y, 1/2+Z.

## Hydrogen bonds in $\kappa_L$ -(DMEDO-TSeF)<sub>2</sub>[Au(CN)<sub>4</sub>](THF)

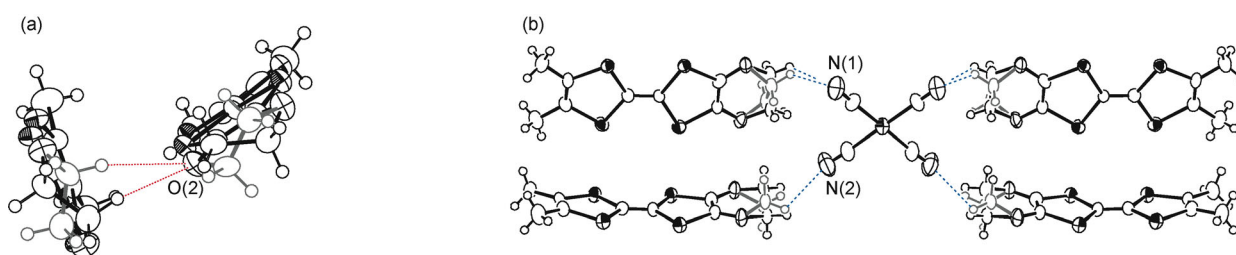

**Fig. 2** Hydrogen bonds in  $\kappa_L$ -phase. (a) Red dotted lines indicate CH $\cdots$ O hydrogen bonds in the donor layer. (b) Blue dotted lines indicate CH $\cdots$ N hydrogen bonds between the donor and the anion. Gray atoms and bonds indicate minor orientation of the disordered ethylene bridge.

**Table 2** Hydrogen bond distances<sup>a</sup> for  $\kappa_L$ -(DMEDO-TSeF)<sub>2</sub>[Au(CN)<sub>4</sub>](THF) less than 3.0 Å

| Atom                                       | Atom   | Distance / Å | ADC <sup>b</sup> | Atom                                       | Atom   | Distance / Å | ADC <sup>b</sup> |
|--------------------------------------------|--------|--------------|------------------|--------------------------------------------|--------|--------------|------------------|
| HCH $\cdots$ O (For the major orientation) |        |              |                  | HCH $\cdots$ O (For the minor orientation) |        |              |                  |
| O(2)                                       | H(7A2) | 2.582        | 55608            | O(2)                                       | H(8B1) | 2.791        | 55608            |
| H <sub>2</sub> CH $\cdots$ O               |        |              |                  |                                            |        |              |                  |
| O(2)                                       | H(9C)  | 2.853        | 56504            |                                            |        |              |                  |
| HCH $\cdots$ N (For the major orientation) |        |              |                  | HCH $\cdots$ N (For the minor orientation) |        |              |                  |
| N(1)                                       | H(7A1) | 2.599        | 1                | N(1)                                       | H(7B1) | 2.381        | 1                |
| N(2)                                       | H(7A1) | 2.820        | 55608            | N(1)                                       | H(7B2) | 2.823        | 1                |
| N(2)                                       | H(7A2) | 2.792        | 55608            | N(2)                                       | H(7B1) | 2.963        | 55608            |
| N(2)                                       | H(8A1) | 2.793        | 1                | N(2)                                       | H(8B1) | 2.843        | 55608            |
| N(2)                                       | H(8A1) | 2.826        | 55608            | N(2)                                       | H(8B2) | 2.949        | 1                |
| H <sub>2</sub> CH $\cdots$ N               |        |              |                  |                                            |        |              |                  |
| N(1)                                       | H(10A) | 2.447        | 66605            | N(1)                                       | H(10C) | 2.927        | 56404            |

<sup>a</sup> The hydrogen bonds shorter than sum of the van der Waals radii are represented by the pink characters; sum of the van der Waals radii; O $\cdots$ H = 2.72 Å; N $\cdots$ H = 2.75 Å. <sup>b</sup> Symmetry operators: (1) +X, +Y, +Z; (2) 1/2+X, 1/2-Y, 1/2-Z; (3) -X, 1/2+Y, -Z; (4) 1/2-X, -Y, 1/2+Z; (5) -X, -Y, -Z; (6) 1/2-X, 1/2+Y, 1/2+Z; (7) +X, 1/2-Y, +Z; (8) 1/2+X, +Y, 1/2-Z.

## Molecular packing of $\kappa_L$ -(DMEDO-TSeF)<sub>2</sub>[Au(CN)<sub>4</sub>](THF)

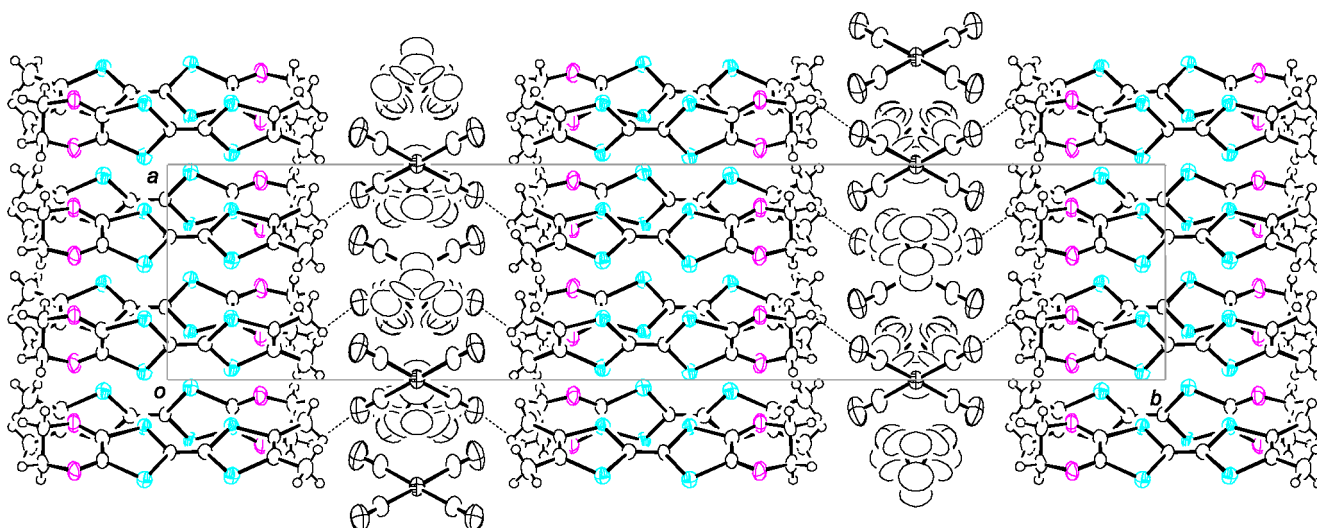

**Fig. 3** Molecular packing of the  $\kappa_L$ -phase viewed along the crystallographic *c*-axis. Dotted lines indicate CH $\cdots$ N hydrogen bonds less than 2.75 Å. The minor orientations of the disordered ethylene bridge of the donor molecule are omitted for clarity.

**Crystal structures for the insulating layer of the  $\kappa_H$ - and  $\kappa_L$ -phase**

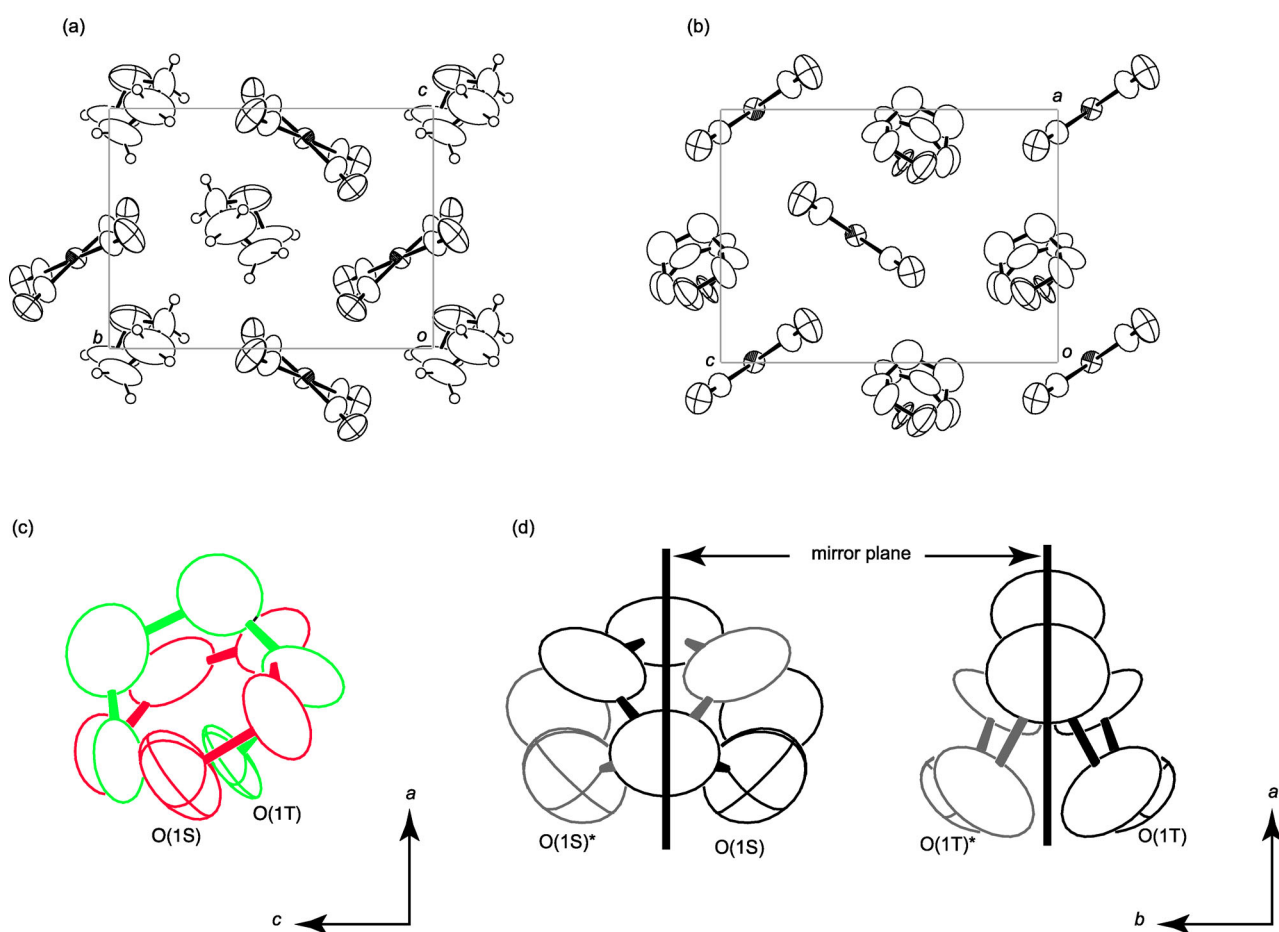

**Fig. 4** Crystal structure for the insulating layer; (a)  $\kappa_H$ -phase projection onto the  $bc$ -plane; (b)  $\kappa_L$ -phase projection onto the  $ac$ -plane. (c) Red and green lines indicate each orientation of the disordered THF molecule in the  $\kappa_L$ -phase viewed along the crystallographic  $b$ -axis. Only the asymmetric units are indicated. (d) Structures for each orientation of THF molecule viewed along the crystallographic  $c$ -axis. Gray lines indicate the atoms and bonds generated by the mirror symmetry.
